# Supplementary material
Source: Research Square preprint supplement (doi:10.21203/rs.3.rs-9766755/v1)
Supplement: Supplementary file 1 [file 2eb1573d705f4d70f227f953.docx]

| Molecule ID | Molecular name | OB (%) | DL | AlogP | Mw | Type |
| --- | --- | --- | --- | --- | --- | --- |
| MOL004876 | Glycyrrhizin | 19.62 | 0.11 | 2.42 | 823.04 | Triterpenoid Saponin |
| MOL004953 | liquiritin apioside | 29.23 | 0.82 | -0.75 | 550.56 | Flavonoid Glycoside |
| MOL004892 | licorice-saponin G2 | 6.39 | 0.11 | 1.33 | 839.04 | triterpenoid saponin |
| MOL003435 | brucine | 7.61 | 0.41 | 1.11 | 394.51 | Alkaloid |
| / | strychnine | / | / | / | / | / |
| MOL000422 | kaempferol | 41.88 | 0.24 | 1.77 | 286.25 | Flavonol |
| MOL000098 | quercetin | 46.43 | 0.28 | 1.50 | 302.25 | Flavonol |
| MOL000211 | Mairin | 55.38 | 0.78 | 6.52 | 456.78 | Triterpenoid Sapogenin |
| MOL000359 | sitosterol | 36.91 | 0.75 | 8.08 | 414.79 | Phytosterol |
| MOL000354 | isorhamnetin | 49.60 | 0.31 | 1.76 | 316.28 | O-Methylated Flavonol |
| MOL000392 | formononetin | 69.67 | 0.21 | 2.58 | 268.28 | Isoflavone |
| MOL001792 | DFV | 32.76 | 0.18 | 2.57 | 256.27 | Isoflavane |
| MOL004328 | naringenin | 59.29 | 0.21 | 2.30 | 272.27 | Dihydroflavanone |
| MOL002311 | Glycyrol | 90.78 | 0.67 | 4.85 | 366.39 | Coumarinderivative |
| MOL003896 | 7-Methoxy-2-methyl isoflavone | 42.56 | 0.20 | 3.36 | 266.31 | Isoflavone |
| MOL000239 | Jaranol | 50.83 | 0.29 | 2.09 | 314.31 | Isoflavone |
| MOL004961 | Quercetin derivative | 46.45 | 0.33 | 1.82 | 330.31 | Flavonol derivative |
| MOL001484 | Inermine | 75.18 | 0.54 | 2.44 | 284.28 | Alkaloid |
| MOL002565 | Medicarpin | 49.22 | 0.34 | 2.66 | 270.30 | Pterocarpan |
| MOL003656 | Lupiwighteone | 51.64 | 0.37 | 3.92 | 338.38 | Isoflavone |
| MOL000417 | Calycosin | 47.75 | 0.24 | 2.32 | 284.28 | Isoflavone |
| MOL004805 | (2S)-2-[4-hydroxy-3-(3-methylbut-2-enyl)phenyl]-8,8-dimethyl-2,3-dihydropyrano[2,3-f]chromen-4-one | 31.79 | 0.72 | 5.48 | 390.51 | Isoflavonederivative |
| MOL004806 | euchrenone | 30.29 | 0.57 | 6.35 | 406.56 | Isoflavone |
| MOL004808 | glyasperin B | 65.22 | 0.44 | 4.02 | 370.43 | Prenylated isoflavone |
| MOL004810 | glyasperin F | 75.84 | 0.54 | 2.97 | 354.38 | Prenylated isoflavone |
| MOL004811 | Glyasperin C | 45.56 | 0.40 | 4.73 | 356.45 | Prenylated isoflavone |
| MOL004814 | Isotrifoliol | 31.94 | 0.42 | 2.99 | 298.26 | Isoflavone |
| MOL004815 | (E)-1-(2,4-dihydroxyphenyl)-3-(2,2-dimethylchromen-6-yl)prop-2-en-1-one | 39.62 | 0.35 | 3.96 | 322.38 | Chalcone |
| MOL004820 | kanzonols W | 50.48 | 0.52 | 3.63 | 336.36 | Prenylated chalcone / Dihydrochalcone |
| MOL004824 | (2S)-6-(2,4-dihydroxyphenyl)-2-(2-hydroxypropan-2-yl)-4-methoxy-2,3-dihydropyrano[2,3-f]chromen-4-one | 60.25 | 0.63 | 2.96 | 384.41 | Coumarin derivative |
| MOL004827 | Semilicoisoflavone B | 48.78 | 0.55 | 2.85 | 352.36 | Isoflavone |
| MOL004828 | Glepidotin A | 44.72 | 0.35 | 3.90 | 338.38 | Isoflavone |
| MOL004829 | Glepidotin B | 64.46 | 0.34 | 3.88 | 340.40 | Isoflavone |
| MOL004833 | Phaseolinisoflavan | 32.01 | 0.45 | 3.95 | 324.40 | Isoflavan |
| MOL004835 | Glypallichalcone | 61.60 | 0.19 | 3.40 | 284.33 | Chalcone |
| MOL004838 | 8-(6-hydroxy-2-benzofuranyl)-2,2-dimethyl-5-chromenol | 58.44 | 0.38 | 4.20 | 308.35 | Benzofuran-chromene |
| MOL004841 | Licochalcone B | 76.76 | 0.19 | 2.88 | 286.30 | Chalcone |
| MOL004848 | licochalcone G | 49.25 | 0.32 | 4.35 | 354.43 | Chalcone |
| MOL004849 | 3-(2,4-dihydroxyphenyl)-8-(1,1-dimethylprop-2-enyl)-7-hydroxy-5-methoxy-coumarin | 59.62 | 0.43 | 4.03 | 368.41 | Prenylated coumarin |
| MOL004855 | Licoricone | 63.58 | 0.47 | 4.16 | 382.44 | Coumarin |
| MOL004856 | Gancaonin A | 51.08 | 0.40 | 4.17 | 352.41 | Isoflavone |
| MOL004857 | Gancaonin B | 48.79 | 0.45 | 3.91 | 368.41 | Isoflavone |
| MOL004863 | 3-(3,4-dihydroxyphenyl)-5,7-dihydroxy-8-(3-methylbut-2-enyl)chromone | 66.37 | 0.41 | 3.65 | 354.38 | Prenylated flavone |
| MOL004864 | 5,7-dihydroxy-3-(4-methoxyphenyl)-8-(3-methylbut-2-enyl)chromone | 30.49 | 0.41 | 4.17 | 352.41 | Prenylated flavone |
| MOL004866 | 2-(3,4-dihydroxyphenyl)-5,7-dihydroxy-6-(3-methylbut-2-enyl)chromone | 44.15 | 0.41 | 3.92 | 354.38 | Prenylated flavone |
| MOL004879 | Glycyrin | 52.61 | 0.47 | 4.67 | 382.44 | Coumarin |
| MOL004882 | Licocoumarone | 33.21 | 0.36 | 4.98 | 340.40 | Coumarin |
| MOL004883 | Licoisoflavone | 41.61 | 0.42 | 3.65 | 354.38 | Isoflavone |
| MOL004884 | Licoisoflavone B | 38.93 | 0.55 | 2.85 | 352.36 | Isoflavone |
| MOL004885 | licoisoflavanone | 52.47 | 0.54 | 2.97 | 354.38 | Isoflavanone (Dihydroisoflavone) |
| MOL004891 | shinpterocarpin | 80.30 | 0.73 | 3.46 | 322.38 | Pterocarpan |
| MOL004898 | (E)-3-[3,4-dihydroxy-5-(3-methylbut-2-enyl)phenyl]-1-(2,4-dihydroxyphenyl)prop-2-en-1-one | 46.27 | 0.31 | 4.49 | 340.40 | Chalcone |
| MOL004903 | liquiritin | 65.69 | 0.74 | 0.66 | 418.43 | Dihydroflavanone glycoside |
| MOL004904 | licopyranocoumarin | 80.36 | 0.65 | 3.04 | 384.41 | Pyranocoumarin |
| MOL004907 | Glyzaglabrin | 61.07 | 0.35 | 2.10 | 298.26 | Isoflavan |
| MOL004908 | Glabridin | 53.25 | 0.47 | 3.95 | 324.40 | Isoflavane |
| MOL004910 | Glabranin | 52.90 | 0.31 | 4.42 | 324.40 | Isoflavan |
| MOL004911 | Glabrene | 46.27 | 0.44 | 3.77 | 322.38 | Isoflavene |
| MOL004912 | Glabrone | 52.51 | 0.50 | 3.12 | 336.36 | Isoflavone |
| MOL004913 | 1,3-dihydroxy-9-methoxy-6-benzofurano[3,2-c]chromenone | 48.14 | 0.43 | 2.99 | 298.26 | Benzofuran-chromenone |
| MOL004914 | 1,3-dihydroxy-8,9-dimethoxy-6-benzofurano[3,2-c]chromenone | 62.90 | 0.53 | 2.98 | 328.29 | Benzofuran-chromenone |
| MOL004915 | Eurycarpin A | 43.28 | 0.37 | 3.92 | 338.38 | Isoflavone |
| MOL004924 | (-)-Medicarpin | 49.22 | 0.34 | 2.66 | 270.30 | Pterocarpan |
| MOL004935 | Sigmoidin-B | 34.88 | 0.41 | 3.89 | 356.40 | Isoflavone |
| MOL004941 | (2R)-7-hydroxy-2-(4-hydroxyphenyl)chroman-4-one | 71.12 | 0.18 | 2.57 | 256.27 | Dihydroflavanone |
| MOL004945 | (2S)-7-hydroxy-2-(4-hydroxyphenyl)-8-(3-methylbut-2-enyl)chroman-4-one | 36.57 | 0.32 | 4.42 | 324.40 | Prenylated dihydroflavanone |
| MOL004948 | Isoglycyrol | 44.70 | 0.84 | 4.36 | 366.39 | Coumarin derivative |
| MOL004949 | Isolicoflavonol | 45.17 | 0.42 | 3.63 | 354.38 | Flavonol / Isoflavone |
| MOL004957 | HMO | 38.37 | 0.21 | 2.58 | 268.28 | Isoflavan |
| MOL004959 | 1-Methoxyphaseollidin | 69.98 | 0.64 | 4.25 | 354.43 | Isoflavone |
| MOL004966 | 3′-Hydroxy-4′-O-Methylglabridin | 43.71 | 0.57 | 3.93 | 354.43 | Isoflavane derivative |
| MOL000497 | licochalcone a | 40.79 | 0.29 | 4.62 | 338.43 | Chalcone |
| MOL004974 | 3′-Methoxyglabridin | 46.16 | 0.57 | 3.93 | 354.43 | Isoflavane derivative |
| MOL004978 | 2-[(3R)-8,8-dimethyl-3,4-dihydro-2H-pyrano[6,5-f]chromen-3-yl]-5-methoxyphenol | 36.21 | 0.52 | 4.20 | 338.43 | Chromene derivative |
| MOL004980 | Inflacoumarin A | 39.71 | 0.33 | 4.70 | 322.38 | Coumarin |
| MOL004985 | icos-5-enoic acid | 30.70 | 0.20 | 7.75 | 310.58 | Fatty acid |
| MOL004988 | Kanzonol F | 32.47 | 0.89 | 5.30 | 420.54 | Prenylated flavonoid / Chalcone derivative |
| MOL004989 | 6-prenylated eriodictyol | 39.22 | 0.41 | 3.89 | 356.40 | Prenylated dihydroflavanone |
| MOL004990 | 7,2',4'-trihydroxy 5-methoxy-3 arylcoumarin | 83.71 | 0.27 | 2.56 | 300.28 | Coumarin |
| MOL004991 | 7-Acetoxy-2-methylisoflavone | 38.92 | 0.26 | 3.15 | 294.32 | Isoflavone derivative |
| MOL004993 | 8-prenylated eriodictyol | 53.79 | 0.40 | 3.89 | 356.40 | Prenylated dihydroflavanone |
| MOL004996 | gadelaidic acid | 30.70 | 0.20 | 7.75 | 310.58 | Fatty acid |
| MOL000500 | Vestitol | 74.66 | 0.21 | 3.15 | 272.32 | Isoflavan |
| MOL005000 | Gancaonin G | 60.44 | 0.39 | 4.17 | 352.41 | Isoflavone |
| MOL005001 | Gancaonin H | 50.10 | 0.78 | 4.71 | 420.49 | Isoflavone |
| MOL005003 | Licoagrocarpin | 58.81 | 0.58 | 4.51 | 338.43 | Prenylated isoflavone / Pterocarpan derivative |
| MOL005007 | Glyasperins M | 72.67 | 0.59 | 3.22 | 368.41 | Prenylated isoflavone |
| MOL005008 | Glycyrrhiza flavonol A | 41.28 | 0.60 | 2.17 | 370.38 | Flavonol |
| MOL005012 | Licoagroisoflavone | 57.28 | 0.49 | 3.48 | 336.36 | Isoflavone |
| MOL005016 | Odoratin | 49.95 | 0.30 | 2.30 | 314.31 | Isoflavone |
| MOL005017 | Phaseol | 78.77 | 0.58 | 4.87 | 336.36 | Isoflavone |
| MOL005018 | Xambioona | 54.85 | 0.87 | 4.68 | 388.49 | Prenylated isoflavone |
| MOL005020 | dehydroglyasperins C | 53.82 | 0.37 | 4.30 | 340.40 | Prenylated isoflavone |
| MOL001040 | (2R)-5,7-dihydroxy-2-(4-hydroxyphenyl)chroman-4-one | 42.36 | 0.21 | 2.30 | 272.27 | Dihydroflavanone |
| MOL000449 | Stigmasterol | 43.83 | 0.76 | 7.64 | 412.77 | Phytosterol |
| MOL000492 | (+)-catechin | 54.83 | 0.24 | 1.92 | 290.29 | Flavan-3-ol (Catechin) |
| MOL001476 | (S)-Stylopine | 51.15 | 0.85 | 3.20 | 323.37 | Benzylisoquinoline alkaloid |
| MOL003411 | Icaride A | 48.74 | 0.43 | 3.77 | 404.50 | Iridoid glycoside derivative |
| MOL003413 | Isostrychnine N-oxide (I) | 35.45 | 0.80 | -0.78 | 352.47 | Indole alkaloid (Strychnos type, N-oxide) |
| MOL003414 | Isostrychnine N-oxide (II) | 37.33 | 0.80 | -0.96 | 350.45 | Indole alkaloid (Strychnos type, N-oxide) |
| MOL003418 | Lokundjoside_qt | 32.82 | 0.76 | 1.00 | 406.57 | Iridoid glycoside aglycone |
| MOL003432 | vomicine | 47.56 | 0.65 | 1.39 | 408.54 | Indole alkaloid (Strychnos type) |
| MOL003433 | brucine-N-oxide | 49.17 | 0.38 | -1.14 | 410.51 | Indole alkaloid (Strychnos type, N-oxide) |
| MOL003436 | Isobrucine | 33.58 | 0.80 | 1.29 | 334.45 | Indole alkaloid (Strychnos type) |
| MOL003440 | Brucine N-oxide | 52.63 | 0.38 | -1.14 | 410.51 | Indole alkaloid (Strychnos type, N-oxide) |
|  |  |  |  |  |  |  |

**Appendix Table 1:** Fundamental properties of all 107 active compounds.
